# Supplementary material for: Alliaceae vegetable consumption and sarcopenia: findings from the TCLSIH cohort study
Source: Royal Society of Chemistry journal article supplement (doi:10.1039/d3fo05623f), 2025-01-01
Supplement: d3fo05623f1.pdf [file d3fo05623f1.pdf]

**Supplementary Table 1.** Principal component analysis varimax-rotated 42 food groups factor loading scores.

| Food groups                                                                        | Fruit and sweet pattern | Traditional oriental pattern | Animal food pattern |
|------------------------------------------------------------------------------------|-------------------------|------------------------------|---------------------|
| Refined grains                                                                     | -0.09                   | <b>0.61</b>                  | -0.17               |
| Noodles                                                                            | 0.16                    | <b>0.22</b>                  | 0.17                |
| Bread                                                                              | 0.19                    | 0.06                         | 0.04                |
| Rice                                                                               | <b>0.25</b>             | 0.17                         | 0.07                |
| Whole grains                                                                       | -0.11                   | <b>0.63</b>                  | -0.09               |
| Dairy products                                                                     | <b>0.20</b>             | 0.04                         | 0.03                |
| Poultry                                                                            | 0.10                    | 0.04                         | <b>0.64</b>         |
| Red meats                                                                          | -0.05                   | 0.06                         | <b>0.60</b>         |
| Organ meats                                                                        | <b>0.42</b>             | -0.04                        | 0.19                |
| Sausage                                                                            | <b>0.26</b>             | <b>0.22</b>                  | 0.08                |
| Chicken egg                                                                        | -0.02                   | <b>0.24</b>                  | <b>0.30</b>         |
| Preserved egg                                                                      | <b>0.28</b>             | -0.07                        | <b>0.26</b>         |
| Seafood (Squid, octopus, lobster, shellfish)                                       | <b>0.42</b>             | 0.02                         | <b>0.33</b>         |
| Fish (fish bone and all, dried fish, fatty fish, and less-fat fish)                | <b>0.30</b>             | 0.13                         | <b>0.29</b>         |
| Dark green and leafy vegetables                                                    | <b>0.28</b>             | <b>0.53</b>                  | <b>0.22</b>         |
| Solanaceous vegetables                                                             | 0.19                    | <b>0.38</b>                  | <b>0.24</b>         |
| Carotenoid vegetables                                                              | <b>0.47</b>             | 0.14                         | 0.12                |
| Starchy vegetables                                                                 | <b>0.28</b>             | <b>0.50</b>                  | -0.04               |
| Mushroom and fungi                                                                 | <b>0.42</b>             | <b>0.24</b>                  | <b>0.35</b>         |
| Hot and sweet peppers                                                              | 0.11                    | <b>0.32</b>                  | 0.19                |
| Tomato                                                                             | -0.17                   | <b>0.51</b>                  | <b>0.27</b>         |
| Bulb vegetable                                                                     | 0.10                    | <b>0.45</b>                  | <b>0.33</b>         |
| Ginger                                                                             | 0.03                    | <b>0.25</b>                  | <b>0.50</b>         |
| Seaweed                                                                            | <b>0.41</b>             | 0.09                         | 0.06                |
| Legumes and soy products                                                           | <b>0.23</b>             | <b>0.36</b>                  | <b>0.28</b>         |
| Preserved vegetables                                                               | 0.14                    | <b>0.40</b>                  | 0.16                |
| Salted eggs                                                                        | 0.09                    | <b>0.33</b>                  | 0.14                |
| Fruits (citrus fruits)                                                             | <b>0.58</b>             | 0.04                         | -0.09               |
| Fruits (all kinds except for citrus fruits, persimmon, strawberry, and kiwi fruit) | <b>0.63</b>             | 0.17                         | -0.12               |
| Fruits (persimmon, strawberry, kiwi fruit)                                         | <b>0.62</b>             | 0.05                         | -0.13               |
| Dim sum (Cakes, cookies, and biscuits)                                             | <b>0.32</b>             | 0.10                         | 0.01                |
| Sweets and desserts                                                                | 0.15                    | 0.10                         | 0.01                |
| Honey                                                                              | 0.11                    | 0.07                         | 0.00                |

|                                 |             |             |             |
|---------------------------------|-------------|-------------|-------------|
| Nuts                            | <b>0.21</b> | <b>0.37</b> | 0.10        |
| Tea                             | 0.08        | <b>0.21</b> | 0.08        |
| Coffee                          | 0.16        | -0.02       | -0.03       |
| Soda and sweetened<br>beverages | 0.18        | -0.07       | 0.06        |
| Fruits or vegetables juice      | 0.05        | -0.06       | 0.02        |
| Alcohol consumption             | -0.06       | 0.12        | <b>0.26</b> |
| Fried foods                     | <b>0.33</b> | <b>0.22</b> | <b>0.27</b> |
| Bean vermicelli                 | 0.08        | 0.09        | <b>0.57</b> |
| Sesame and sesame<br>products   | 0.05        | 0.02        | <b>0.51</b> |

---

Loadings with an absolute value more than 0.20 are shown in bold.

**Supplementary Table 2. Adjusted association between inflammatory markers and incident sarcopenia (n=1,913).**

| Cox proportional hazard regression models | Q1            | Q2                             | Q3                | Q4                | <i>P</i> for trend <sup>a</sup> |
|-------------------------------------------|---------------|--------------------------------|-------------------|-------------------|---------------------------------|
| Plt (10 <sup>9</sup> /L)                  | (0.27, 206.0) | (206.0, 241.0)                 | (241.0, 282.0)    | (282.0, 3271.0)   | -                               |
| Participants, n                           | 500           | 471                            | 467               | 475               | -                               |
| Cases, n                                  | 77            | 65                             | 79                | 81                | -                               |
| Person-years                              | 1,400         | 1,289                          | 1,341             | 1,357             | -                               |
| Incidence per 1000 person-years           | 55            | 50.4                           | 58.9              | 59.7              | -                               |
| Model 1 <sup>b</sup>                      | 1.00 (Ref)    | 0.94 (0.68, 1.31) <sup>c</sup> | 1.06 (0.78, 1.45) | 1.07 (0.78, 1.46) | 0.53                            |
| Model 2 <sup>d</sup>                      | 1.00 (Ref)    | 0.96 (0.69, 1.34)              | 1.15 (0.84, 1.58) | 1.08 (0.79, 1.48) | 0.44                            |
| Model 3 <sup>e</sup>                      | 1.00 (Ref)    | 0.94 (0.67, 1.32)              | 1.17 (0.85, 1.62) | 1.09 (0.79, 1.51) | 0.39                            |
| Model 4 <sup>f</sup>                      | 1.00 (Ref)    | 0.90 (0.64, 1.27)              | 1.19 (0.86, 1.65) | 1.07 (0.77, 1.48) | 0.38                            |
| WBC (10 <sup>9</sup> /L)                  | (1.00, 4.40)  | (4.40, 5.10)                   | (5.10, 6.10)      | (6.10, 308.0)     | -                               |
| Participants, n                           | 516           | 463                            | 441               | 493               | -                               |
| Cases, n                                  | 103           | 60                             | 63                | 76                | -                               |
| Person-years                              | 1,450         | 1,291                          | 1,286             | 1,360             | -                               |
| Incidence per 1000 person-years           | 71            | 46.5                           | 49                | 55.9              | -                               |
| Model 1 <sup>b</sup>                      | 1.00 (Ref)    | 0.65 (0.48, 0.90) <sup>c</sup> | 0.68 (0.50, 0.93) | 0.79 (0.59, 1.06) | 0.11                            |
| Model 2 <sup>d</sup>                      | 1.00 (Ref)    | 0.76 (0.55, 1.04)              | 0.82 (0.60, 1.12) | 0.93 (0.69, 1.26) | 0.64                            |
| Model 3 <sup>e</sup>                      | 1.00 (Ref)    | 0.74 (0.54, 1.03)              | 0.73 (0.53, 1.01) | 0.79 (0.57, 1.08) | 0.12                            |
| Model 4 <sup>f</sup>                      | 1.00 (Ref)    | 0.74 (0.53, 1.03)              | 0.74 (0.53, 1.02) | 0.79 (0.58, 1.09) | 0.14                            |
| NEUT (10 <sup>9</sup> /L)                 | (1.70, 51.9)  | (51.9, 57.5)                   | (57.5, 62.9)      | (62.9, 732.0)     | -                               |
| Participants, n                           | 506           | 464                            | 466               | 477               | -                               |
| Cases, n                                  | 75            | 81                             | 73                | 73                | -                               |
| Person-years                              | 1,457         | 1,316                          | 1,316             | 1,298             | -                               |

|                                 |              |                                |                   |                   |      |
|---------------------------------|--------------|--------------------------------|-------------------|-------------------|------|
| Incidence per 1000 person-years | 51.5         | 61.6                           | 55.5              | 56.2              | -    |
| Model 1 <sup>b</sup>            | 1.00 (Ref)   | 1.24 (0.91, 1.70) <sup>c</sup> | 1.12 (0.81, 1.54) | 1.15 (0.83, 1.59) | 0.53 |
| Model 2 <sup>d</sup>            | 1.00 (Ref)   | 1.31 (0.95, 1.79)              | 1.15 (0.83, 1.59) | 1.14 (0.82, 1.58) | 0.58 |
| Model 3 <sup>e</sup>            | 1.00 (Ref)   | 1.25 (0.90, 1.72)              | 1.10 (0.79, 1.52) | 1.14 (0.82, 1.59) | 0.61 |
| Model 4 <sup>f</sup>            | 1.00 (Ref)   | 1.25 (0.91, 1.73)              | 1.13 (0.81, 1.57) | 1.13 (0.81, 1.58) | 0.6  |
| LY (10 <sup>9</sup> /L)         | (1.20, 29.2) | (29.2, 33.8)                   | (33.8, 39.2)      | (39.2, 2538.0)    | -    |
| Participants, n                 | 494          | 477                            | 463               | 479               | -    |
| Cases, n                        | 71           | 79                             | 77                | 75                | -    |
| Person-years                    | 1,321        | 1,369                          | 1,315             | 1,382             | -    |
| Incidence per 1000 person-years | 53.7         | 57.7                           | 58.6              | 54.3              | -    |
| Model 1 <sup>b</sup>            | 1.00 (Ref)   | 1.03 (0.75, 1.42) <sup>c</sup> | 1.06 (0.77, 1.46) | 0.96 (0.70, 1.33) | 0.85 |
| Model 2 <sup>d</sup>            | 1.00 (Ref)   | 0.99 (0.72, 1.37)              | 1.16 (0.84, 1.62) | 0.96 (0.69, 1.33) | 0.98 |
| Model 3 <sup>e</sup>            | 1.00 (Ref)   | 0.96 (0.69, 1.34)              | 1.10 (0.79, 1.54) | 0.94 (0.67, 1.32) | 0.92 |
| Model 4 <sup>f</sup>            | 1.00 (Ref)   | 0.99 (0.71, 1.38)              | 1.11 (0.80, 1.56) | 0.95 (0.68, 1.33) | 0.92 |
| NLR                             | (0.03, 1.32) | (1.32, 1.70)                   | (1.70, 2.15)      | (2.15, 35.0)      | -    |
| Participants, n                 | 494          | 473                            | 473               | 473               | -    |
| Cases, n                        | 75           | 82                             | 70                | 75                | -    |
| Person-years                    | 1,413        | 1,346                          | 1,355             | 1,273             | -    |
| Incidence per 1000 person-years | 53.1         | 60.9                           | 51.7              | 58.9              | -    |
| Model 1 <sup>b</sup>            | 1.00 (Ref)   | 1.17 (0.86, 1.60) <sup>c</sup> | 0.99 (0.72, 1.38) | 1.17 (0.85, 1.61) | 0.56 |
| Model 2 <sup>d</sup>            | 1.00 (Ref)   | 1.36 (0.99, 1.86)              | 0.99 (0.72, 1.38) | 1.20 (0.87, 1.66) | 0.63 |
| Model 3 <sup>e</sup>            | 1.00 (Ref)   | 1.26 (0.91, 1.74)              | 0.95 (0.68, 1.33) | 1.19 (0.85, 1.65) | 0.67 |
| Model 4 <sup>f</sup>            | 1.00 (Ref)   | 1.27 (0.92, 1.75)              | 0.97 (0.69, 1.36) | 1.18 (0.85, 1.64) | 0.67 |

|                                 |              |                                |                   |                   |      |
|---------------------------------|--------------|--------------------------------|-------------------|-------------------|------|
| PLR                             | (0.01, 5.74) | (5.74, 7.19)                   | (7.19, 8.83)      | (8.83, 348.7)     | -    |
| Participants, n                 | 494          | 473                            | 473               | 473               | -    |
| Cases, n                        | 75           | 71                             | 76                | 80                | -    |
| Person-years                    | 1,404        | 1,369                          | 1,272             | 1,342             | -    |
| Incidence per 1000 person-years | 53.4         | 51.9                           | 59.7              | 59.6              | -    |
| Model 1 <sup>b</sup>            | 1.00 (Ref)   | 0.96 (0.70, 1.33) <sup>c</sup> | 1.17 (0.85, 1.61) | 1.13 (0.82, 1.54) | 0.29 |
| Model 2 <sup>d</sup>            | 1.00 (Ref)   | 0.99 (0.72, 1.38)              | 1.23 (0.90, 1.70) | 1.09 (0.79, 1.49) | 0.38 |
| Model 3 <sup>e</sup>            | 1.00 (Ref)   | 0.98 (0.70, 1.36)              | 1.26 (0.91, 1.74) | 1.10 (0.80, 1.51) | 0.34 |
| Model 4 <sup>f</sup>            | 1.00 (Ref)   | 0.98 (0.70, 1.36)              | 1.27 (0.91, 1.76) | 1.09 (0.79, 1.51) | 0.34 |

Abbreviation: Plt, platelet; WBC, white blood cell; NEUT, neutrophil; LY, lymphocyte; NLR, neutrophil-to-lymphocyte ratio; PLR, platelet-to-lymphocyte ratio.

<sup>a</sup> Obtained by using multivariable Cox regression models.

<sup>b</sup> Model 1 was crude model.

<sup>c</sup> Hazard ratio (95% confidence interval) (all such values).

<sup>d</sup> Model 2 was adjusted for age (continuous: years), sex (males or females), and body mass index (continuous: kg/m<sup>2</sup>).

<sup>e</sup> Model 3 was additionally adjusted for smoking status (current smoker, nonsmoker or ex-smoker), drinking status (everyday, sometime, ex-drinker or nondrinker), physical activity (continuous: MET-hour/week), education level (< or ≥ senior), household income (< or ≥ 3000 yuan/m), diabetes (yes or no), hypertension (yes or no), hyperlipidemia (yes or no), coronary heart disease (yes or no), depressive symptoms score (< or ≥ 45) and total energy intake (quartiles).

<sup>f</sup> Model 4 was further adjusted for dietary patterns (quartiles).
